# Supplementary material
Source: PubMed Central journal article supplement (PMC5864137)
Supplement: DC161990SupplementaryData.pdf [file DC161990SupplementaryData.pdf]

SUPPLEMENTARY DATA

**Supplementary Figure S1.** HbA<sub>1c</sub> target attainment and mean HbA<sub>1c</sub> by age group

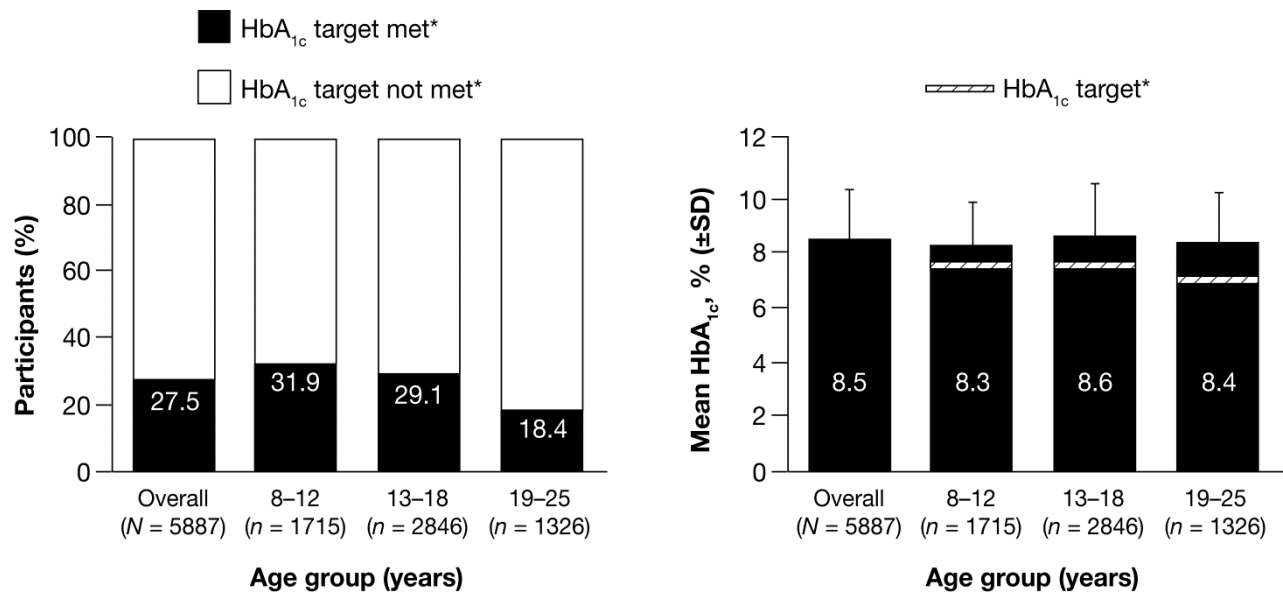

**Supplementary Table S1.** Participant and Family Characteristics

|                                          | 8–12 y/o<br>(n=1715) | 13–18 y/o<br>(n=2846) | 19–25 y/o<br>(n=1326) | Overall<br>(n=5887) |
|------------------------------------------|----------------------|-----------------------|-----------------------|---------------------|
| <b>Participant Characteristics</b>       |                      |                       |                       |                     |
| <b>Age (years), mean (SD)</b>            | <b>10.3 (1.4)</b>    | <b>15.3 (1.6)</b>     | <b>21.3 (1.9)</b>     | <b>15.2 (4.2)</b>   |
| <b>Female, %</b>                         | 49                   | 48                    | 49                    | 49                  |
| <b>Race (Caucasian), %</b>               | 77                   | 75                    | 73                    | 75                  |
| <b>Duration of T1D (yrs.), mean (SD)</b> | <b>4.5 (2.7)</b>     | <b>6.6 (3.8)</b>      | <b>11.0 (4.7)</b>     | <b>7.0 (4.4)</b>    |
| <b>Family Factors</b>                    |                      |                       |                       |                     |
| <b>Family involved in care,%</b>         |                      |                       |                       |                     |
| Participants alone                       | 2                    | 18                    | 55                    | 22                  |
| Parents                                  | 84                   | 71                    | 35                    | 67                  |
| Other people                             | 15                   | 11                    | 11                    | 12                  |

## SUPPLEMENTARY DATA

### TEENs – List of Contributors

**Algeria:** Samira Abdelazziz, Nacera Abdellah El Hadj, Malha Azzouze, Hadda Baaziz, Housseem Baghousse, Ali Barchiche, Dahila Bekat, Farroudja Benbouaza, Menoubia Bensmina, Karima Berkouk, Zahia Boudarda, Djamilia Boukria, Amina Daoudi, Yacine Farhani, Chawki Kadache, Samir Ladj, Nouredine Maalam, Chahra Mezouar, Nouioua Mohamed, Samia Oukaci, Hariti Rabah, Bendeddouche Salih, Mehamed Yakhou, Hamadache Zahra Hayet; **Argentina:** Patricia Castaño, Mabel Ferraro, Sonia Hermida, Carmen Mazza, Alejandra Oviedo, Blanca Ozuna, María Lidia Ruiz, Liliana Trifone, Liliana Tucano; **Denmark:** Joan Banke, Jeanne Hedeveg, Thomas Hertel, Anne Marie Hertz, Lene Jørgensen, Sten Lund, Julie Bech Olesen, Birthe Olsen, Susanne Vedersø, Lone Vestergaard, Lone Vesterskov, Lene Winter; **Egypt:** Hala Abdel Hamid, Amira Abdelmoniem, Mohamed Abo ElAsrar, Abeer Ahmed, Mona Attia, Nancy ElBarbary, Mohamed ElHefnawy, Nevine Gamal, Jonair Hussein, Eman Mahmoud, Mona Mamdouh, Eman Mounir, Noha Musa, Inas Sabry, Mona Samahi, Mona Salem, Rasha Thabet; **France:** Paola Adiceam, Claire Ballot Schmit, Sabine Baron, Jacques Beltrand, Anne-Marie Bertrand, Lisa Bories, Gaëlle Buron, Fabienne Dalla-Vale, Elise Dutertre, Murielle Francois-Gerard, Claire Le Tallec, Vanessa Lory, Brigitte Mignot, Caroline Mignot, Carole Morin, Sylvie Palazzolo, Michel Polak, Eric Renard, Rachel Reynaud, Jean-Jacques Robert, Céline Robin, Randa Salet, Gibert Simonin; **Germany:** Bärbel Aschemeier, Sarah Bläsing, Thomas Danne, Sina Dannenberger, Nicolin Datz, Jürgen Grulich-Henn, Elke Hammer, Bettina Heidtmann, Sascha Heinitz, Liska Kamprad, Thomas Kapellen, Olga Kordonouri, Franziska Liebrich, Martina Lösch-Binder, Erika Marquardt, Andreas Neu, Junis Rajab, Kerstin Remus, Kerstin Schnell, Roland Schweizer, Christiane Schultheiß, Christiana Tsioli, Silja Schumacher; **Hungary:** Prof. Dr Laszlo Barkai, Dr Katalin Fehertemplomi, Dr Janos Tibor Kis, Dr Robert Takacs, Dr Andras Török; **India:** Maruti Basarge, Dr. Sudhir Bhandari, Amit Bhatt, Meeta Bodgal, Krishnaveni Boligarla, Seema Chalkore, Dr. Sanjay Chatterjee, Priya Darshini, Dr. Kalpana Dash, Dr. Neeta Deshpande, Barkha Goyal, Varanasi Harini, Dr. Sunil Jain, Dr. Sujeet Jha, Dr. Sanjay Kalra, Sneha Katamble, Dr. Jothydev Kesavadev, Shamal Khalse, Paruchuru Kiran Rao, Joice Koshy, Gopika Krishnan, Trupti Kukde, Dr. Prasanna Kumar, Dr. Sailesh Lodha, Varsha Lodha, Deepa Lokhande, Binushma Mini, Dr. K.D. Modi, Dr. Vishwanathan Mohan, Kalyan More, Remy Nair, Wasifa Muzaffar Naqashbandi, Vijay Narola, Neeraj Pande, Nandakumar Parathasartha, Reshma Parmaj, Krishna Patel, Palak Patel, Apurba Paul, Dr. Sharad Pendsey, Vinod Pushpa, Aditya Rajan, Charanjit Roy, Dr. Archana Sarda, Sampath Sarda, Dr. Jashvant Shah, Dr. Parag Shah, Arun Shankar, Dr. Dinesh Chandra Sharma, Sanooja M. Sherief, Dr. Manikant Singla, Monika Singla, Poongothai Subramani, Vishnu Vandana, Nidhi Verma, Bhawana Yadav; **Italy:** Claudia Balsamo, Federica Barni, Isabella Bellagamba, Danila Benevento, Anna Biscarini, Gianni Bona, Marco Cappa, Francesco Cadario, Francesca Cardella, Valentino Cherubini, Giuseppe Chiumello, Paola Cipriano, Giuseppe D'Annunzio, Laura De Angelis, Giuseppina Di Dio, Elena Dondi, Maria Felicia Faienza, Barbara Felappi, Matteo Ferrari, Adriana Franzese, Anna Paola Frongia, Giulio Frontino, Alfonso Galderisi, Sara Galetti, Chiara Giorgetti, Monica Guasti, Carla Guidi, Dario Iafusco, Concetta Irace, Alfonso La Loggia, Lorenzo Lenzi, Fortunato Lombardo, Renata Lorini, Vincenza Luce, Maddalena Macedoni, Claudio Maffei, Giulio Maltoni, Marco Marigliano, Anna Lisa Martini, Paolo Massirio, Elisabetta Mencaroni, Franco Meschi, Carlamaria Monciotti, Enza Mozzillo, Gianluca Musolino, Monica Nasetti, Chiara Penengo, Barbara Piccini, Alessandro Plebani, Barbara Polisca, Elena Prandi, Francesco Prisco, Ivana Rabbone, Francesca Redaelli, Alessandra Rollo, Rosalia Roppolo, Alessandro Salvatoni, Giuseppina Salzano, Silvia Savastio, Andrea Scaramuzza, Sabrina Scelfo, Riccardo Schiaffini, Mirella Scipione, Claudia Soldani, Davide Tinti, Eleonora Tognato, Sonia Toni, Stefano Tumini, Claudia Ventrici, Fiorella Zanetta, Angela Zanfardino, Eugenio Zito, Stefano Zucchini; **Jordan:** Nadima Shegem, Basem Zoubi; **Lebanon:** Pascal Maalouf Nawfal, Rita Medlej, Claude Rayes, Hala Tfayli; **Mexico:** Luis Aguilar, Raul Aguilar Orozco, Ronald Alcázar, Gerardo Aguirre, María Arechavaleta, Rosalva Avena, Margarita Barrientos, María Barrientos, Rosa Cardona, Juan Castillo, María Chagoyán, Aleida Contreras, Alejandra del Muro, Mayela Franco, Raymundo García, Jose Garza, Andrés González, Marissa Gonzalez, Ricardo González, Ana Hermsillo, Mayra Hernández, Luis Herrera, Luis Ibarra, Laura Islas, Israel Juárez, Norma Juárez, Jesús Lujan, Daniela Mata, Octavio Medel, Patricia Medina, Nancy Morales, Paz Munguía, Cynthia Mustieles, Martha Ordaz, Victoria Padilla, Ana Payan, Irving Peralta, Ana Pérez, María Plauchu, Jonathan Ramírez, Pedro Ramos, Carlos Recio, Humberto Rivera, Francisco Robledo, Elizabeth Rocha, Monika Rodríguez, Sandra Saavedra, Erika Salazar, Leobardo Sauque, Rebeca Sousa, Héctor Tamez, Monica Vanhorn, Armando Vargas, Anahy Vazquez, Maricela Vidrio, Rolando Zamarripa; **Morocco:** Samah Amhager, Nawal Ansari, Naima Bennani, Chafiq Benohoud, Ghizlane El Mghari Tabib, Nadia Ibnousaufyane, Zineb Imane; **Portugal:** Marisol Anselmo, Sónia Antunes, Graciete Braganca, Marina Dingle, Isabel Fernandes, Ana Lopes, Alice Mirante, Ana Cristina Monteiro, Jorge Portugal, Luisa Raimundo, Andreia Veloza, Sofia Vidal; **Romania:** Mariana Andreica, Dumitra Balan, Simona Cainap, Adriana Cosmescu, Victoria Cref, Georgiana Jalba, Monica Marazan, Ioana Micle, Cristina Maria Mihai, Maria Mihaela Mihu, Mirela Neacsu, Carmen Novac, Carmen Oltean, Ileana Puiu, Dorina Siler, Cleo Simionescu, Daniela Zaharie; **Russia:** Diana Alpenidze, Victoria Andreeva, Ekaterina Andrianova, Elena Bashnina, Andrey Emelyanov, Tatiana Katorzhanskaya, Vadim Katorzhanskiy, Alexey Kiyaev, Margarita Kovarenko, Dmitry Laptev, Oleg Malievsky, Eugeniya Mihaylova, Valentina Peterkova, Boris Romashevsky, Irina Rybkina, Roza Salimullina, Larisa Shilova, Elena Sibileva, Galina Ternovaya, Victoria Tupik, Valentina Tuz, Marina Volodina, Olga Votyakova, Lubov Zilberman; **Slovenia:** Tadej Battelino, Nataša Bratina, Nataša Godina; **South Africa:** Beverley Balanco, Francis Bonnici, Anke Diedericks, Kelly Francis, Yasmeen Ganie, Sedeshan Govender, Sureka Maharaj, Ayesha Motala, Imran Paruk, Areti Philotheou, Devika Pillay, Kubendran Pillay, Fraser Pirie, David Segal, Lyn Starck, Jacobus van Dyk, Lynette van Dyk, Janie vd Bergh, Linda Webster; **Spain:** Iñaki Arguelles, Dolores Barbero, Jesus Barreiro, Raquel Barrio, Joan Bel, David Benaiges, Jose Antonio Bermudez, Amaya Blanco, Paloma Cabanas, Maria Caimari, Roque Cardona, Carmen Carreras, Gemma Carreras, Federico Carretto, Lidia Castro, Juan Jose Chillaron, Elisabet Coca, Raquel Corripio, Carmen de la Cuesta, Diego de Sotto, Ignacio Diez, Carmina Dominguez, Maria Dominguez, Jose Ignacio Fernandez, Jone Fernandez, Marta Ferrer, Juana Antonia Flores, Concepcion Freijo, Maria Florinda Hermoso, Raul Hoyos, Ana Lucia Gomez, Consuelo Gonzalez, Nina Gonzalez, Isabel Gonzalez, Jesus Gonzalez, Gema Grau, Maria Jose Lopez, Rosa Maria Lozano, Cristina Luzuriaga, Maria Martin, Andres Mingorance, Marta Murillo, Immaculada Palenzuela, Jacobo Perez, Manuel Pombo, Itxaso Rica, Maria Teresa

## SUPPLEMENTARY DATA

Rivero, Mercedes Rodriguez, Rosario Rubio, Luis Salamanca, Isabel Serrano, Nora Sivo, Rosa Yelmo; **Sweden:** Mari Adamsson, Christina Ahlberg, Anders Andersson, Hjärdis Andersson, Margareta Berggren, Birgitta Blank, Jenny Callan, Jan Dahlgren, Johan Fredlund, Anette Groth, Peter Hallgren, Ragnar Hanås, Eva Landgren, Jenny Lingman Framme, Ingela Lavin, Magnus Ljungcrantz, Elena Lundberg, Kristin Lundqvist, Nils Osten Nilsson, Eva-Lena Olofsson, Katrin Östlund, Erika Persson, Josefin Roswall, Anett Ryden, Görel Stengård, Anna Lena Stolt, Eva Strigård, Hanna Sandberg, Annika Sjöstrand, Britt-Louise Svensson, Eva Toft, Lena Windell, Nils Wramner; **United States:** Kimber-Lee Abel, Natalie Ayala, Joni Beck, Jennifer Bedard, Robert Benjamin, Tymara Berry, Kathleen Bethin, Scott Blackman, Trista Borgwardt, Katie Bowen, Judy Brault, Chris Brown, Emil Buscaino, Cassie Burt, Joanne Cabbage, Tammy Calvano, Darryll Cappiello, A. Pinar Cemeroglu, Eda Cengiz, Anna Christian, Mark Clements, Kenneth Copeland, Amy Criego, Mark Daniels, Larry Deeb, Linda DiMeglio, Michelle Ecker, Rachel Edelen, Aliza Elrod, Marie Fox, Ashutosh Gupta, Jean Halford, D'Anne Hannah, Heidi Haro, Katerina Harwood, Jeanne Hassing, Joanne Hathway, Lois Hester, Kirstie Jarrett, Susan Kearns, Julie Kittelsrud, Lora Kleis, Georgeanna Klingensmith, Lorna Lasure, Joane Less, David Liljenquist, Katherine Manseau, Frances Melchionne, Sanjeev Mehta, Lucy Montoya, Elaine Moreland, Bonnie Murray, Beth Olson, Cherly Owens, Linda Owens, Vanessa Patrick, Joey Phillips, Roxanne Phillips, Catherine Pihoker, Vandana Raman, Camille Ratliff, Jennifer Raymond, Valerie Ruelas, Peggy Scoggin, Alan Schultz, Paola Sequeira, Hillarie Slater, Heather Speer, Amber Spruill, Amy Steffen, Lee Ann Thomas, Eva Tsalikian, Steven Willi, Amie Williams, Stephanie Woerner, Karen Wheeler, Michael Wood, Joyce Yi-Frazer.
